# Supplementary material for: A comparative study on the implementation of deep learning algorithms for detection of hepatic necrosis in toxicity studies
Source: PubMed Central journal article supplement (PMC10313597; doi:10.1007/s43188-023-00173-5), 2023-04-06
Supplement: 43188_2023_173_MOESM1_ESM.pdf [file 43188_2023_173_MOESM1_ESM.pdf]

## Supplementary Information

### A comparative study on the implementation of deep learning algorithms for detection of hepatic necrosis in toxicity studies

**Journal:** *Toxicological Research*

Ji-Hee Hwang, Minyoung Lim, Gyeongjin Han, Heejin Park, Yong-Bum Kim, Jinseok Park, Sang-Yeop Jun, Jaeku Lee, Jae-Woo Cho

<sup>1</sup>Toxicologic Pathology Research Group, Department of Advanced Toxicology Research, Korea Institute of Toxicology, Daejeon 34114, Korea

<sup>2</sup>Department of Advanced Toxicology Research, Korea Institute of Toxicology, Daejeon 34114, Korea

<sup>3</sup>Research & Development Team, LAC Inc., Seoul 07807, Korea

\*Correspondence: cjwoo@kitox.re.kr; Tel.: +82-42-610-8023

**(a) object detection model label**    **(b) segmentation model label**

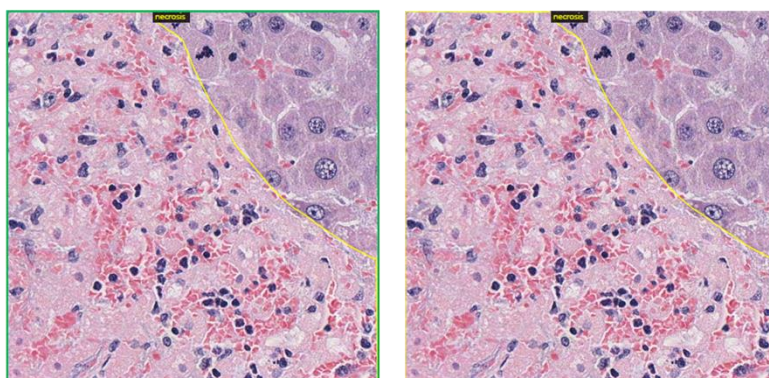

**Online Resource 1** - The examples of labels (see yellow outline) according to the models. The lesions were characterized using nuclear dissolution and fragmentation with pale eosinophilic cytoplasm in the image and hemorrhage. In addition, the object detection model SSD's label includes not only the hepatic necrosis but also normal cells in the bounding box annotation (a), occasionally making the  $448 \times 448$ -pixel tile itself the annotation for the hepatic necrosis (see green outline). The segmentation model separates the lesion from other cells in the annotation (b).

**Online Resource 2.** The number of images and annotations used for algorithm training. The numbers in parentheses include augmented images or annotations created by reverse, rotation, and brightness image-augmenting techniques.

|              | Number of images | Number of annotations |
|--------------|------------------|-----------------------|
| <b>Train</b> | 350 (5600)       | 355 (5680)            |

|                   |            |            |
|-------------------|------------|------------|
| <b>Validation</b> | 100        | 104        |
| <b>Test</b>       | 50         | 51         |
| <b>Total</b>      | 500 (5750) | 510 (5835) |

**Online Resource 3.** Hyperparameters used for training each network

| <b>Network Type</b> | <b>Mask R-CNN</b>     | <b>DeeplabV3<sup>+</sup></b> | <b>SSD</b>             |
|---------------------|-----------------------|------------------------------|------------------------|
| <b>Parameters</b>   | BACKBONE = resnet152  | BACKBONE = "resnet"          | COCO_API = "PythonAPI" |
|                     | DIST_BACKEND = "nccl" | LR = 0.01                    | EPOCHS = 400           |
|                     | BATCH_SIZE = 16       | EPOCHS = 200                 | BATCH_SIZE = 64        |
|                     | LR = 0.005            | BATCH_SIZE = 32              | LR = 0.0003            |
|                     | EPOCHS = 200          | DATASET = "COCO"             | WEIGHT_DECAY = 0.00003 |
|                     | WORKERS = 16          | MASK_THRESHOLD = 0.6         | MOMENTUM = 0.9         |
|                     | LR_STEPS = 16, 22     |                              | CONFIDENCE = 0.5       |
|                     | CONFIDENCE = 0.5      |                              |                        |
